1 **Characterization of the signalling modalities of prostaglandin E2**  
2 **receptors EP2 and EP4 reveals crosstalk and a role for microtubules**

3 **Ward Vleeshouwers<sup>1</sup>, Koen van den Dries<sup>1</sup>, Sandra de Keijzer<sup>1</sup>, Ben Joosten<sup>1</sup>, Diane S.**  
4 **Lidke<sup>2,3,\*</sup> and Alessandra Cambi<sup>1,\*</sup>**

5 <sup>1</sup>Department of Cell Biology, Radboud Institute for Molecular Life Sciences, Radboud University  
6 Medical Center, Nijmegen, Netherlands.

7 <sup>2</sup>Department of Pathology, University of New Mexico Health Sciences Center, Albuquerque, New  
8 Mexico, United States of America.

9 <sup>3</sup>Comprehensive Cancer Center, University of New Mexico Health Sciences Center, Albuquerque,  
10 New Mexico, United States of America.

11

12 **\* Correspondence:**

13 Corresponding Author

14 [alessandra.cambi@radboudumc.nl](mailto:alessandra.cambi@radboudumc.nl), [dclidke@salud.unm.edu](mailto:dclidke@salud.unm.edu)

15

16

17

18 **Keywords: membrane receptor, prostaglandin E2 signalling, myeloid cells, G protein-coupled**  
19 **receptor, podosome.**

20 **Abstract**

21 Prostaglandin E2 (PGE2) is a lipid mediator that modulates the function of myeloid immune cells such  
22 as macrophages and dendritic cells (DCs) through the activation of the G protein-coupled receptors  
23 EP2 and EP4. While both EP2 and EP4 signalling leads to an elevation of intracellular cyclic adenosine  
24 monophosphate (cAMP) levels through the stimulating  $G\alpha_s$  protein, EP4 also couples to the inhibitory  
25  $G\alpha_i$  protein to decrease the production of cAMP. The receptor-specific contributions to downstream  
26 immune modulatory functions are still poorly defined. Here, we employed quantitative imaging  
27 methods to characterize the early EP2 and EP4 signalling events in myeloid cells and their contribution  
28 to the dissolution of adhesion structures called podosomes, which is a first and essential step in DC  
29 maturation. We first show that podosome loss in DCs is primarily mediated by EP4. Next, we  
30 demonstrate that EP2 and EP4 signalling leads to distinct cAMP production profiles, with EP4 inducing  
31 a transient cAMP response and EP2 inducing a sustained cAMP response only at high PGE2 levels.  
32 We further find that simultaneous EP2 and EP4 stimulation attenuates cAMP production, suggesting a  
33 reciprocal control of EP2 and EP4 signaling. Finally, we demonstrate that efficient signaling of both  
34 EP2 and EP4 relies on an intact microtubule network. Together, these results enhance our  
35 understanding of early EP2 and EP4 signalling in myeloid cells. Considering that modulation of PGE2  
36 signalling is regarded as an important therapeutic possibility in anti-tumour immunotherapy, our  
37 findings may facilitate the development of efficient and specific immune modulators of PGE2  
38 receptors.

## 39 Introduction

40

41 The ability of cells to respond to their environment is critical for their function. Important players for  
42 transmitting extracellular information into intracellular signalling events are the G protein-coupled  
43 receptors (GPCRs) [1]. The spatiotemporal organization of GPCRs within the cell membrane allows  
44 these receptors to elicit fine-tuned cellular responses to different ligands.

45 Prostaglandins are lipid mediators that represent an abundant type of GPCR ligand.  
46 Prostaglandins are derived from cyclooxygenase (COX)-catalyzed metabolism of arachidonic acid and  
47 exhibit versatile actions in a wide variety of tissues [2; 3]. Prostaglandin E2 (PGE2) signals via the  
48 four GPCRs EP1-4, expressed in various combinations at the plasma membrane of cells [4](REF).  
49 PGE2 modulates several key immunological processes including the activation, migration and cytokine  
50 production of different immune cells such as dendritic cells (DCs), macrophages and T lymphocytes  
51 [3; 5; 6; 7; 8]. Despite being a known mediator of inflammation, increased PGE2 concentrations have  
52 been associated with a highly immunosuppressive tumor microenvironment (TME) of several cancer  
53 types [9; 10; 11; 12; 13].

54 DCs are commonly observed in the TME of solid tumors [14]. Yet, despite their potential to  
55 generate anti-tumor immunity, TME-resident DCs often exhibit impaired or defective function [15].  
56 The high PGE2 levels in the TME might play a role since PGE2 promotes IL-10 production by DCs  
57 [16]. On the other hand, PGE2 is also important for inducing the highly migratory phenotype typical  
58 of mature DCs and which is crucial in immunity [6]. Understanding how PGE2 exerts its dual function  
59 in DCs can offer novel leads to reverse unwanted DC immunosuppression in the context of anti-tumor  
60 immunity.

61 PGE2 modulates DC function exclusively via EP2 and EP4 [6; 17; 18]. For example, PGE2 has  
62 previously been shown to induce the dissolution of podosomes, which are actin-rich adhesion structures  
63 involved in tissue-resident immature DC migration, through the cAMP-PKA-RhoA signaling axis  
64 downstream of EP2 and EP4 [8]. PGE2-induced podosome dissolution is an important step towards  
65 DC maturation, but the receptor-specific contributions to these processes are still poorly defined.

66 Signaling via EP2 and EP4 is predominantly transduced by the stimulating G $\alpha_s$  protein (G $\alpha_s$ ),  
67 leading to increased activity of adenylate cyclase (AC) and subsequent elevation of intracellular cyclic  
68 adenosine monophosphate (cAMP) levels [19; 20]. An important difference between EP2 and EP4 is  
69 the reported capacity of EP4 to also couple to inhibitory G $\alpha_i$  protein (G $\alpha_i$ ), thereby inhibiting cAMP  
70 formation and activating a phosphatidylinositol 3-kinase (PI3K) pathway [21; 22]. Furthermore, in  
71 contrast to EP2, EP4 is rapidly internalized upon ligand binding [23; 24; 25]. Altogether, these  
72 observations suggest that signal modalities (intensity, duration, downstream effectors) likely differ  
73 between EP2 and EP4 and a better understanding of EP2 and EP4 signalling modalities is key to  
74 understand PGE2 effects in DC biology.

75 Here, we aimed to characterize EP2 and EP4 early signaling events in response to PGE2 in  
76 myeloid cells. We first demonstrate that in DCs, PGE2 leads to podosome dissolution primarily through  
77 EP4 signalling. Next, we show that selective EP2 and EP4 stimulation leads to distinct cAMP  
78 production profiles and suggest reciprocal control of receptor signalling efficiency. Finally, we  
79 demonstrate that the integrity of the cortical microtubule network is important for efficient EP2 and  
80 EP4 signalling. Modulation of PGE2 signalling is considered an important therapeutic possibility in  
81 anti-tumour immunotherapy. Our findings enhance our understanding of early EP2 and EP4 signaling  
82 and may thereby facilitate the development of efficient and specific modulators of PGE2 signalling  
83 receptors that can contribute to reverse tumor immunosuppression [26].

## 84 **Materials and methods**

85

### 86 **Chemicals and reagents**

87 Cells were treated with several compounds that activated or inhibited EP2 and EP4: EP2 agonist (R)-  
88 Butaprost (Sigma), EP4 agonist L-902688 (Cayman Chemicals), EP2 antagonist AH6809 (Cayman  
89 Chemicals), EP4 antagonist GW627368X (Cayman Chemicals) or AH23848 (Cayman Chemicals),  
90 pertussis toxin (TOCRIS biosciences), PGE2 (Cayman Chemicals), Pertussis Toxin (PTx, Calbiochem,  
91 San Diego, CA) and nocodazole (Sigma). Compounds used for immunofluorescence staining were  
92 mouse anti-vinculin antibody (Sigma, V9131), Goat anti-Mouse-(H&L)-Alexa488 and Goat anti-  
93 Mouse-(H&L)-Alexa647 secondary antibodies (Invitrogen), Alexa488-conjugated phalloidin  
94 (Invitrogen, A12379) and Texas Red-conjugated phalloidin (Invitrogen, T7471), Mowiol (Sigma).

95

### 96 **Cell culture**

97 RAW 246.7 cells were cultured in RPMI-1640 medium (Gibco) supplemented with 10% Fetal Bovine  
98 Serum (FBS, Greiner Bio-one), 1mM Ultra-glutamine (BioWitthaker) and 0.5% Antibiotic-  
99 Antimytotic (AA, Gibco). iDCs were derived from PBMCs as described previously [27; 28] and  
100 cultured in RPMI 1640 medium (Gibco) supplied with 10% Fetal Bovine Serum (FBS, Greiner Bio-  
101 one). Transfections with t-Epac-vv [29] (gift from K. Jalink),  $G\alpha_s$ -GFP (gift from M. Rasenick),  $G\alpha_i$ -  
102 GFP and  $G\alpha_{i1}$ -Citrine [30] (gift from A. Gilman),  $G\gamma_2$ -CFP and  $G\beta_1$  wildtype (both gifts from M.  
103 Adjobo-Hermans) were performed with Fugene HD (Roche) according to the manufacturer protocol  
104 and imaged after 24 h. Stable cell lines expressing  $G\alpha_s$ -GFP and  $G\alpha_i$ -GFP was maintained using the  
105 appropriate antibiotics. Cells were plated one day prior to measurements or transfection in Willco  
106 dishes (Willco Wells BV) at 400.000 cells/dish or in 96 well-plate (microplate BD Falcon) at 40.000  
107 cells/well or in 4-well Lab-Tek II chambered coverglass (Nunc) at 100.000 cells/chamber. Prior to  
108 imaging, the medium was replaced with 1 ml RPMI medium without phenol red to avoid background  
109 fluorescence.

110

### 111 **Podosome dissolution assay and widefield immunofluorescence**

112 For agonist experiments, iDCs were treated with (R)-Butaprost, L-902688 or 10  $\mu$ M PGE2 for 10 min.  
113 For antagonist and pertussis toxin experiments, iDCs were pretreated with 3  $\mu$ M AH6809 for 1 h, 10  
114  $\mu$ M GW627368X for 1 h, 100 ng/ml pertussis toxin for 16 hrs as previously described [22] or left  
115 untreated prior to the addition of PGE2. After stimulation, iDCs were fixed in 3.7% (w/v) formaldehyde  
116 in PBS for 10 min. Cells were permeabilized in 0.1% (v/v) Triton X-100 in PBS for 5 min and blocked  
117 with 2% (w/v) BSA in PBS. The cells were incubated with mouse anti-vinculin antibody for 1 h.  
118 Subsequently, the cells were washed with PBS and incubated with GaM-(H&L) secondary antibody  
119 and phalloidin for 45 min. Lastly, samples were washed with PB prior to embedding in Mowiol. Cells  
120 were imaged on a Leica DM fluorescence microscope with a 63 $\times$  PL APO 1.3 NA oil immersion lens  
121 and a COHU high-performance integrating CCD camera (COHU, San Diego, CA) or a Zeiss LSM 510  
122 microscope equipped with a PlanApochromatic 63x/1.4 NA oil immersion objective. Images were  
123 analyzed using Fiji-based software [31].

124

### 125 **FRET experiments**

126 RAW macrophages expressing t-Epac-vv were imaged using a BD Pathway high-content imaging  
127 inverted widefield microscope (BD biosciences) equipped with a 20X 0.75 N.A. objective (Olympus  
128 LUCPLFLN). A mercury metal halide lamp combined with an excitation filter (440/10) was used to  
129 excite mTurquoise. The fluorescence emission was filtered using a dichroic mirror (458-DiO1) and  
130 filters (479/40 and 542/27 for mTurquoise and Venus emission, respectively). Emission was collected  
131 by a high-resolution cooled CCD camera (1344x1024 pix, 0.32  $\mu$ m/pix). Samples were prepared in a  
132 96 well-plate (microplate BD Falcon) from which the inner 60 wells were used. Cells were pretreated

133 with with 100 ng/ml pertussis toxin for 16 hrs or left untreated before adding 3  $\mu$ M AH6809 for 1 h,  
134 or 10  $\mu$ M GW627368X for 1 h, with and without 5  $\mu$ M nocodazole for 20 min,. Six mTurquoise and  
135 Venus emission images were acquired followed by automated addition of PGE2 and subsequent  
136 acquisition of another 20 mTurquoise and Venus emission images ( $t_{lag}=10$  s). The mean fluorescence  
137 intensity of the Venus and mTurquoise signal in a cell was corrected by subtraction of the background  
138 signal in each image and channel before dividing the Venus over mTurquoise mean fluorescence  
139 intensity to obtain the FRET ratio. Values were normalized to the average ratio value of the first six  
140 prestimulus data points.

141

#### 142 **FLIM experiments**

143 Frequency-domain FLIM experiments on transfected RAW macrophages were performed using a  
144 Nikon TE2000-U inverted widefield microscope and a Lambert Instruments Fluorescence Attachment  
145 (LIFA; Lambert Instruments) for lifetime imaging. A light-emitting diode (Lumiled LUXEON III,  $\lambda_{max}$   
146 = 443 nm) modulated at 40 MHz was used to excite CFP. Fluorescence detection was performed by a  
147 combination of a modulated (40 MHz) image intensifier (II18MD; Lambert Instruments) and a  
148 640x512 pixel CCD camera (CCD-1300QD; VDS Vosskühler). The emission of CFP was detected  
149 through a narrow emission filter (475/20 nm; Semrock) to suppress any fluorescence emission from  
150 the Citrine fluorophore. FLIM measurements were calibrated with a 1  $\mu$ M solution of pyranine (HPTS),  
151 the lifetime of which was set to 5.7 ns. All FLIM images were calculated from phase stacks of 12  
152 recorded images, with exposure times of individual images ranging from 200 to 400 ms. A USH-  
153 102DH 100 W mercury lamp (Nikon) was used for acceptor photobleaching. Cells were pretreated  
154 with 25  $\mu$ M AH23848 for 1 h or left untreated and cells were stimulated with 10  $\mu$ M PGE2 or 10  $\mu$ M  
155 Butaprost.

## 156 Results

157

### 158 EP4 primarily contributes to PGE2-induced podosome dissolution in DCs.

159 To assess different contributions of EP2 and EP4 in mediating PGE2 signalling in DCs, we determined  
160 the effect of receptor-specific inhibition or stimulation in podosome dissolution. We first treated  
161 immature DCs (iDCs) with PGE2 or selective EP2 and EP4 agonists and quantified the number of  
162 podosomes per cell (**Figure 1A,B**). In line with our previous observations, addition of PGE2 resulted  
163 in an almost complete loss of podosomes in iDCs. Interestingly, both EP2- and EP4-specific  
164 stimulation reduced the number of podosomes, with EP4 agonist stimulation being slightly more  
165 efficient (**Figure 1B**). These results indicate that individual EP2 and EP4 downstream signalling can  
166 lead to podosome dissolution.

167 To better investigate the respective contribution of EP2 and EP4 signalling after the addition of  
168 their natural ligand PGE2, we pretreated the cells with selective EP2 and EP4 antagonists before PGE2  
169 addition and subsequently quantified podosome dissolution. **Figure 1C** shows that inhibition of EP4  
170 attenuates podosome dissolution upon stimulation with 0.01-0.1  $\mu\text{M}$  PGE2, while blocking of EP2 has  
171 no effect. This indicates that at lower PGE2 concentrations, EP4 is responsible for the induction of  
172 podosome loss. Interestingly, at PGE2 concentrations  $\geq 1 \mu\text{M}$ , EP4 blocking attenuates podosome  
173 dissolution only when EP2 antagonist is co-administered, suggesting that EP2 triggering by PGE2  
174 could somehow influence EP4 activity.

175 These results show that the use of EP agonists does not allow for the detection of the differential  
176 contribution of the receptors in mediating PGE2 signalling. Therefore, the use of selective receptor  
177 antagonists in combination with the natural ligand PGE2 was chosen to define the individual  
178 contributions of EP2 and EP4 in subsequent experiments.

179

### 180 EP2 and EP4 differentially stimulate cAMP production

181 PGE2-induced podosome loss in DCs is mediated by the cAMP-PKA-RhoA signaling axis  
182 downstream of EP2 and EP4 [8]. Since our results strongly suggest that EP4 is primarily responsible  
183 for podosome loss, we sought to determine whether EP4 induces stronger cAMP responses to PGE2  
184 than EP2. To determine the individual contribution of EP2 and EP4 to the PGE2-induced increase of  
185 intracellular cAMP levels, we measured the onset of cAMP production in living RAW macrophages,  
186 which endogenously express both EP2 and EP4 [32], using ratio measurements of the Förster  
187 Resonance Energy Transfer (FRET)-based cAMP sensor t-Epac-vv [29]. Since the binding of cAMP  
188 to t-Epac-vv reduces FRET between the mTurquoise donor and Venus acceptor fluorophores, a  
189 decreased FRET ratio in the macrophages is a direct measure of cAMP production (**Figure 2A,B**).  
190 After the addition of PGE2, cAMP was produced immediately and reached a maximum concentration  
191 after about 40 seconds, subsiding to lower levels after 200 seconds (**Figure 2C**). To compare the cAMP  
192 kinetics across different treatment conditions, we quantified the peak of cAMP production and the  
193 production rate, as shown in **Figure 2D**. Both parameters scaled with increasing PGE2 concentrations,  
194 indicating that the rate and the magnitude of the induced cAMP response is dose-dependent (**Figure**  
195 **2E**).

196 Compared to PGE2 only, EP2 inhibition led to higher cAMP levels at all tested PGE2  
197 concentrations, while cAMP concentrations subsided to a similar extent (**Figure 2F**). The PGE2-  
198 induced cAMP production rate and cAMP peak remained dose-dependent upon EP2 inhibition as both  
199 parameters scaled with PGE2 concentration (**Figure 2G**). These results indicate that EP2 blockade  
200 increases the signaling efficiency of EP4 in response to PGE2. Inhibition of EP4 led to dramatically  
201 different cAMP production. In contrast to EP2 inhibition, robust cAMP production was not observed  
202 until 1  $\mu\text{M}$  PGE2 when EP4 signaling was blocked (**Figure 2H,I**). Furthermore, this strong cAMP  
203 response did not attenuate as observed in the absence of EP4 inhibition. Compared to PGE2 only, the

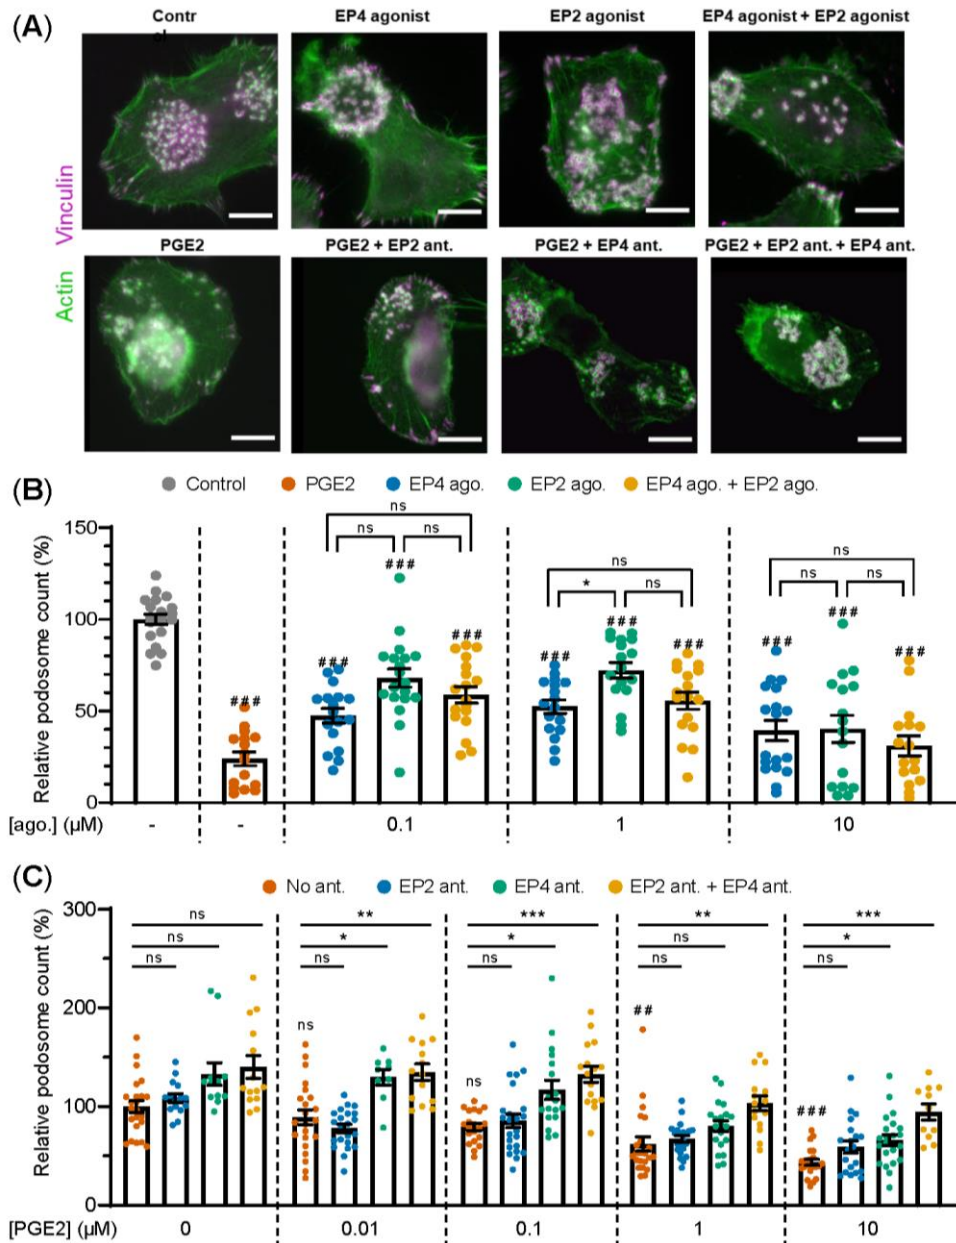

204 **Figure 1. PGE2-induced podosome dissolution in human iDCs is mostly mediated by EP4.** (A)  
 205 Representative images of PBMC-derived iDCs that were left untreated or were treated with 1  $\mu$ M EP4 agonist  
 206 L-902688, 1  $\mu$ M EP2 agonist (R)-Butaprost, both 1  $\mu$ M L-902688 and 1  $\mu$ M (R)-Butaprost, 1  $\mu$ M PGE2 alone  
 207 or 1  $\mu$ M PGE2 after pretreatment with EP2 antagonist (ant.) AH6809, EP4 antagonist GW627368X or both  
 208 AH6809 and GW627368X. Cells were stained for actin (green) and vinculin (magenta). Scale bar = 10  $\mu$ m.  
 209 Scale bar = 10  $\mu$ m. (B) iDCs were treated with different concentrations of EP2 agonist (ago.) (R)-Butaprost,  
 210 EP4 agonist L-902688 or both (R)-Butaprost and L-902688. Cells were stained for actin and vinculin and the  
 211 number of podosomes per image was quantified and normalized to untreated control. Cells treated with 10  $\mu$ M  
 212 PGE2 were included as positive control. The error bars represent mean  $\pm$  SEM. Data presented are from 2  
 213 different donors. ns = not significant, \* $P$ <0.05; \*\*\* $P$ <0.001 versus untreated control, Welch ANOVA with  
 214 Dunnett's T3 multiple comparison test. (C) iDCs were treated with different concentrations of PGE2 with or  
 215 without pretreatment with EP2 antagonist (ant.) AH6809, EP4 antagonist GW627368X or both AH6809 and  
 216 GW627368X. Cells were stained for actin and vinculin and the number of podosomes per image was quantified  
 217 and normalized to untreated control. The error bars represents mean  $\pm$  SEM. Data presented are from three  
 218 different donors. ns = not significant, \* $P$ <0.05, \*\* $P$ <0.01, \*\*\* $P$ <0.001; ## $P$ <0.01, ### $P$ <0.001 versus untreated  
 219 control, Welch ANOVA with Dunnett's T3 multiple comparison test.

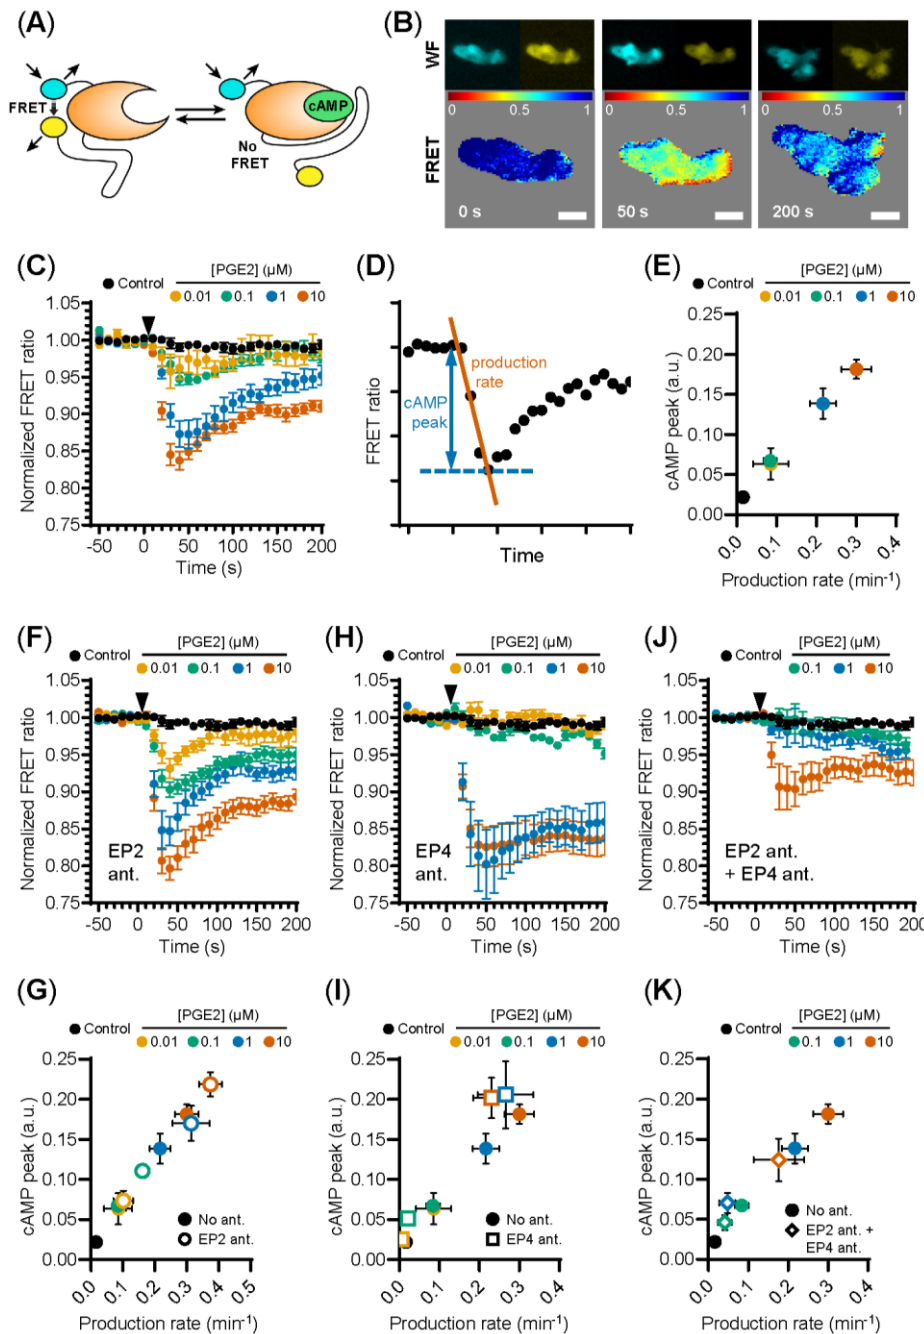

**Figure 2. EP2 and EP4 induce distinct cAMP responses.** (A) Schematic illustration of intramolecular cAMP FRET sensor t-Epac-vv. Binding of cAMP to t-Epac-vv reduces FRET between the mTurquoise donor and Venus acceptor fluorophores of t-Epac-vv, making a decreased ratio of the fluorescent intensities a direct measure of cAMP accumulation (adapted from (REF)). (B) The mTurquoise (cyan) and Venus (yellow) signal were acquired with widefield microscopy (WF panels). After background subtraction in each image and channel, the FRET ratio was calculated as the Venus intensity over the mTurquoise intensity for each timepoint and was normalized to the average of prestimulus values (FRET panels). Normalized FRET values range from 0 (red) to 1 (blue). Scale bar = 5  $\mu$ m. (C) FRET ratios of t-Epac-vv before and after the addition of different PGE2 concentrations were measured in transiently transfected RAW macrophages. A control was performed with the addition of buffer only. The data presented are mean  $\pm$  SEM from  $\geq 5$  cells per condition. (D) Example FRET curve that illustrates the

261 definition of the relative cAMP peak and cAMP production rate. The amplitude of the cAMP peak was defined  
 262 as the maximal decrease in FRET ratio. The cAMP production rate was quantified by determining the slope  
 263 between the final prestimulus timepoint and the timepoint at which minimal FRET ratios were observed using  
 264 a linear fit over all included timepoints. (E) The cAMP production peak and the cAMP production rate were  
 265 measured from the FRET curve of individual cells from (C) and the average peak was plotted as a function of  
 266 the average production rate per condition. The error bars represent SEM for both parameters. (F, H, J) FRET  
 267 ratios were measured after the addition of PGE2 in cells pretreated with EP4 antagonist (ant.) GW627368X (F),  
 268 pretreated with EP2 antagonist AH6809 (H) or pretreated with both GW627368X and AH6809 (J). The data  
 269 presented are mean  $\pm$  SEM from  $\geq 4$  cells per condition. (G, I, K) The relative cAMP production peak and the  
 270 cAMP production rate were measured from (F), (H) and (J), respectively. The error bars represent SEM for  
 271 both parameters.

272



273 magnitude of the strong cAMP response observed upon EP4 inhibition suggests that EP4 response did  
274 not attenuate as observed in the absence of EP4 inhibition. Compared to PGE2 only, the magnitude of  
275 the strong cAMP response observed upon EP4 inhibition suggests that EP4 activity may somehow  
276 impair the signaling efficiency of EP2. To ascertain that EP2 and EP4 are completely blocked by the  
277 antagonist concentrations used in our experiments, we measured cAMP production upon simultaneous  
278 inhibition of EP2 and EP4 (**Figure 2J**). Pretreatment with both antagonists effectively inhibited total  
279 cAMP production at 0.1 and 1  $\mu\text{M}$  PGE2, showing that both receptors are completely blocked at  
280 physiological concentrations of PGE2 (**Figure 2J,K**).

281 Our results demonstrate that the selective stimulation of EP2 and EP4 by PGE2 induces  
282 kinetically distinct cAMP production profiles. While PGE2-EP4 signalling results in a fast and  
283 transient cAMP production that linearly increases with increasing ligand concentrations, PGE2-EP2  
284 signalling is induced only by PGE2 concentrations above 1  $\mu\text{M}$  and cAMP production and is more  
285 prolonged. We also show that co-stimulation of EP2 and EP4 mutually dampens their signaling  
286 efficiency, as both receptors induce higher cAMP production when they are individually triggered by  
287 PGE2.

288

### 289 **EP4-coupled $G\alpha_i$ finetunes the PGE2-induced cAMP production**

290 Given that EP2 and EP4 differentially control cAMP dynamics, we sought to identify factors that  
291 contribute to these differences. Since the inhibitory G protein  $G\alpha_i$  has been shown to couple to EP4  
292 [22], we hypothesized that  $G\alpha_i$  dampens the PGE2-induced cAMP response in cells expressing EP4.  
293 To demonstrate that EP4 selectively activates  $G\alpha_i$  also in macrophages, we performed fluorescence  
294 lifetime imaging (FLIM) to measure FRET between cyan fluorescent protein (CFP)-tagged  $G\gamma$  ( $G\gamma$ -  
295 CFP) and Citrine-tagged  $G\alpha_i$  ( $G\alpha_i$ -Citrine). The fluorescent lifetime of the FRET donor decreased upon  
296 co-expression with the acceptor and was restored to control levels upon acceptor photobleaching  
297 (**Figure 3A**), indicating that FRET occurred between  $G\gamma$ -CFP and  $G\alpha_i$ -Citrine. Since  $G\alpha_i$  is known to  
298 undergo conformational rearrangements upon activation [33] and FRET between  $G\gamma$ -CFP and  $G\alpha_i$ -  
299 Citrine is likely affected by such rearrangements, a shift in fluorescence lifetime is expected upon EP4  
300 stimulation. Treatment with PGE2 induced a gradual reduction in the lifetime of the donor fluorophore,  
301 whereas no shift in the lifetime phase was observed upon either inhibition of EP4 or selective  
302 stimulation of EP2 (**Figure 3B**). These findings confirm that PGE2 induces  $G\alpha_i$  activation via EP4  
303 only.

304 To determine the consequences of EP4-mediated  $G\alpha_i$  activation on PGE2 signaling, we  
305 measured cAMP elevation using t-Epac-vv upon inhibition of  $G\alpha_i$  with pertussis toxin (PTx).  $G\alpha_i$   
306 blockade significantly enhanced the cAMP peak concentrations and production induced by 0.1  $\mu\text{M}$   
307 PGE2 and by 1  $\mu\text{M}$  PGE2, albeit at a lower extent (**Figure 3C**), indicating that  $G\alpha_i$  attenuates cAMP  
308 production most strongly at lower PGE2 concentrations. The effect of  $G\alpha_i$  inhibition on cAMP  
309 production is more clearly depicted in Figure 3D, where a higher cAMP peak and an increased  
310 production rate are observed after addition of PTx.

311 Next, to investigate whether EP4-mediated  $G\alpha_i$  activation would enhance cAMP-dependent  
312 processes such as podosome dissolution, we determined PGE2-mediated podosome loss in iDCs with  
313 or without PTx treatment. We found that  $G\alpha_i$  inhibition led to slightly increased podosome loss at all  
314 PGE2 concentrations tested, with 1  $\mu\text{M}$  PGE2 being statistically significant while 0.01 and 0.1  $\mu\text{M}$   
315 PGE2 show a non-significant but clear trend (**Figure 3E**). It should be considered that such low  
316 concentrations of PGE2 are less powerful in inducing podosome dissolution, which means that PTx  
317 effect is more difficult to assess. This result indicates that the  $G\alpha_i$ -mediated dampening of cAMP  
318 production also affects cellular decisions downstream of EP2 and EP4.

319 Together, these findings indicate that  $G\alpha_i$  dampens the onset of cAMP production, suggesting  
320 that the PGE2-EP4- $G\alpha_i$  axis might act as signalling gatekeeper when low PGE2 levels slightly  
321 fluctuate.

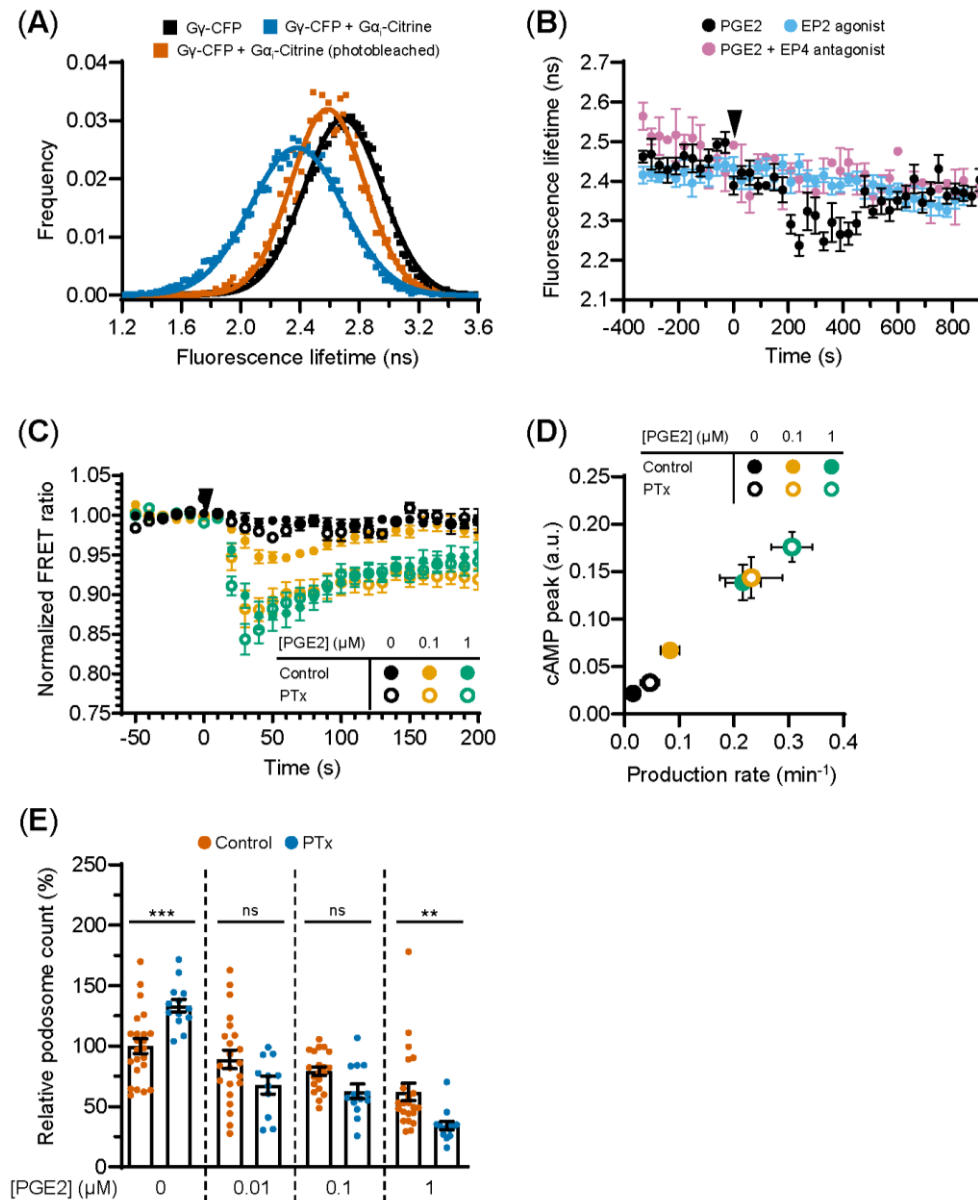

322 **Figure 3. EP4-coupled  $G\alpha_i$  dampens the PGE2-induced cAMP production.** (A) RAW macrophages were  
 323 transfected with Gy-CFP only or with Gy-CFP (donor),  $G\alpha_i$ -Citrine (acceptor) and  $G\beta$  wildtype together. The  
 324 average lifetime of Gy-CFP for individual cells were calculated from frequency-domain FLIM images and the  
 325 distributions were fitted with a Gaussian profile (solid lines) to obtain the average lifetimes. Photobleaching of  
 326  $G\alpha_i$ -Citrine was used as a control for the occurrence of FRET. (B) The average donor lifetime in cells expressing  
 327 both donor and acceptor is plotted before and after addition of 10  $\mu$ M PGE2 in absence or presence of EP4  
 328 antagonist AH23848 or after addition of 10  $\mu$ M EP2 agonist Butaprost. The data presented are mean  $\pm$  SEM  
 329 from >5 cells. (C) FRET ratios of t-Epac-vv before and after addition of PGE2 were measured in transiently  
 330 transfected RAW macrophages that were left untreated or were pretreated with  $G\alpha_i$  inhibitor pertussis toxin  
 331 (PTx). Controls were performed with the addition of buffer only. The data presented are mean  $\pm$  SEM of  
 332 measurements from  $\geq 4$  cells per condition. (D) The cAMP peak and the cAMP production rate were quantified  
 333 as described in Figure 2D from (C) and the average peak was plotted as a function of the average production  
 334 rate per condition. The error bars represent SEM for both parameters. (E) iDCs were treated with different  
 335 concentrations of PGE2 with or without PTx pretreatment. Cells were stained for actin and vinculin and the  
 336 number of podosomes per image was quantified and normalized to untreated control. The error bars represents  
 337 mean  $\pm$  SEM. Data presented are from three different donors. \*\*P<0.01, \*\*\*P<0.001, Welch ANOVA with  
 338 Dunnett's T3 multiple comparison test.

### 339 EP2- and EP4-mediated signalling requires cortical microtubule integrity

340 Since the interplay between G proteins and tubulin is well documented as well as their localization  
 341 along microtubules [34; 35; 36], we investigated whether microtubule integrity is important for PGE2-  
 342 induced cAMP production. We found that microtubule disruption deregulates PGE2-induced cAMP  
 343 elevation (**Figure 4A**). More specifically, when both receptors are activated, attenuation of the cAMP  
 344 response by nocodazole was only observed at 1  $\mu$ M PGE2 and not at 0.1  $\mu$ M PGE2 (**Figure 4A,B**).  
 345 Upon EP2 inhibition, however, the cAMP production rate and the maximum cAMP levels induced by  
 346 PGE2-EP4 were reduced at all PGE2 concentrations tested (**Figure 4C,D**). Finally, EP4 inhibition  
 347 revealed that the PGE2-EP2 strong and sustained cAMP response is completely prevented by  
 348 microtubule disruption (**Figure 4E,F**). These results demonstrate that the  $G\alpha_s$ -mediated cAMP  
 349 response to PGE2 relies on an intact microtubule network and that disruption of this network reduces  
 350 the signaling efficiency of both EP2 and EP4, with EP2 activity being significantly more sensitive to  
 351 microtubule integrity than EP4 activity.  
 352

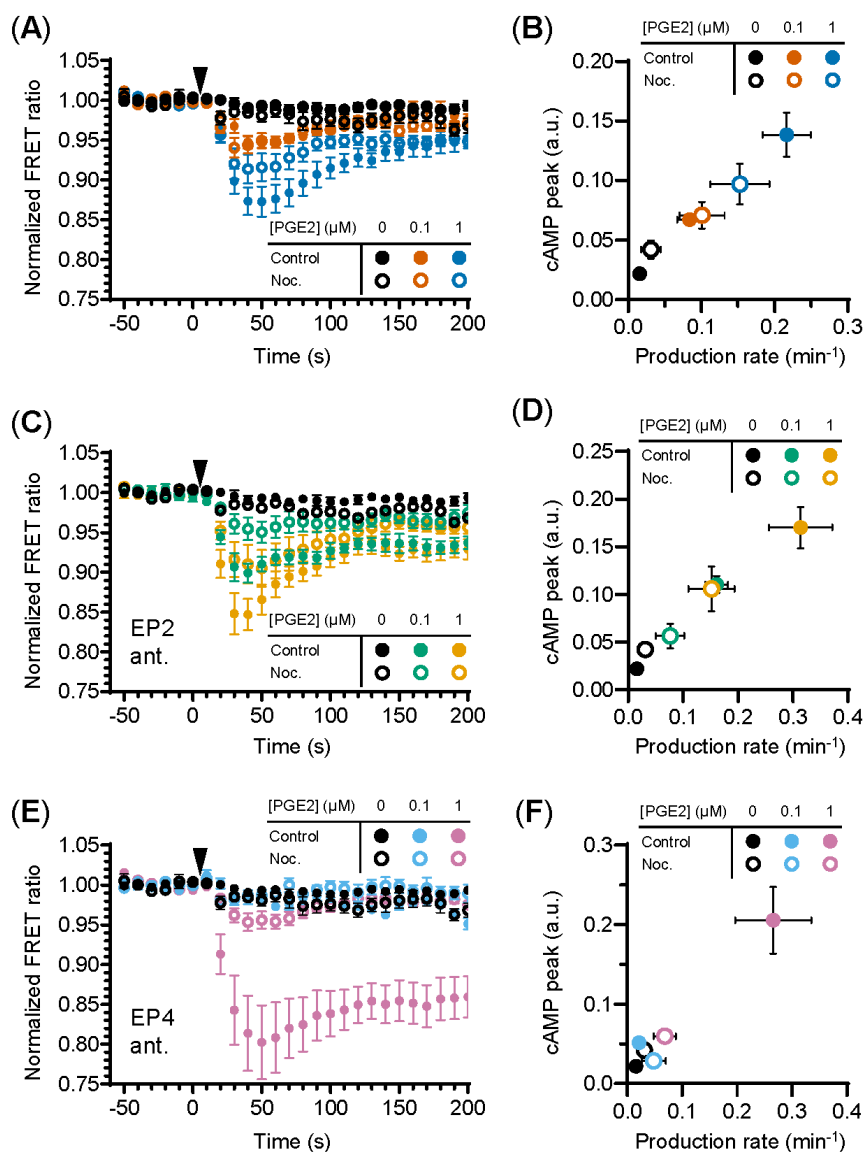

### Figure 4. Efficient signaling of EP2 and EP4 relies on microtubule integrity.

(A, C, E) The FRET ratio of t-Epac-vv was measured in cells that were untreated or pretreated with nocodazole (Noc.) before and after addition of PGE2. Shown are the ratios obtained in cells in the absence of antagonists (A), in the presence of EP2 antagonist AH6809 (C) or EP4 antagonist GW627368X (E). Controls were performed with the addition of buffer only. The data are mean  $\pm$  SEM from  $\geq 5$  cells per condition. (B, D, F) The cAMP production peak and the cAMP production rate were measured from the FRET curve of individual cells from (A), (C) and (E), respectively, and the average peak was plotted as a function of the average production rate per condition. The error bars represent SEM for both parameters.

## 381 Discussion

382

383 This study characterized the EP2 and EP4 signalling modalities to better understand DC and  
384 macrophage responses elicited by PGE2. Our first important observation is that selective activation of  
385 EP2 and EP4 by agonists leads to different outcomes compared to activation by PGE2 in the presence  
386 of selective receptor antagonists. More specifically, when the receptors are individually activated by a  
387 selective agonist, podosome dissolution is almost equally induced by EP2 and EP4, whereas podosome  
388 dissolution is mostly mediated by EP4 after the addition of natural ligand PGE2 in the presence of  
389 selective antagonists. Throughout this study we consistently applied selective antagonists to determine  
390 individual receptor contributions to PGE2 signalling and show that 1) both EP2 and EP4 signal more  
391 efficiently when selectively activated by their natural ligand PGE2; 2) EP4 induces dose-dependent  
392 and transient cAMP production, whereas EP2 induces a sustained cAMP response only at high PGE2  
393 concentration; 3) EP4-linked  $G\alpha_i$  dampens both PGE2-induced cAMP generation and podosome  
394 dissolution; 4) microtubule disruption obstructs efficient signaling of both receptors with a very strong  
395 effect particularly on EP2 activity.

396 We here show that also PGE2-induced podosome loss in iDCs [18] is differentially controlled  
397 by EP2 and EP4. PGE2-induced podosome dissolution is a first step towards the acquisition of a fast  
398 migratory phenotype by DCs [18; 37]. In fact, PGE2 is an important factor to induce DC maturation  
399 and by using selective agonists, both EP2 and EP4 have been proposed to play similar roles in this  
400 process [6; 16]. Our results rather suggest that this might not be the case and that EP4 is likely the most  
401 predominant receptor mediating PGE2 signalling leading to migratory mature DCs. This is in line with  
402 previous findings in gene-targeting experiments in mice, where PGE2-EP4 signalling was found to  
403 promote migration and maturation of Langerhans cells, thereby initiating skin immune responses [38].  
404 Similarly, other PGE2-mediated immunological processes such cytokine production and T cell  
405 activation have been reported to be controlled differently by EP2 and EP4 [39; 40; 41]. Knockdown of  
406 EP2 or EP4 in DCs possibly in combination with the use of agonists and antagonists might eventually  
407 help to clarify these differences. However, since EP2 and EP4 are always co-expressed in DCs, one  
408 will have to rule out that knockdown of one receptor will not affect expression patterns of the other  
409 receptor.

410 Early studies characterizing the EP receptor signaling capacity have mostly used cells that  
411 overexpress either EP2 or EP4 [22; 23; 25; 42; 43; 44], which makes it challenging to determine the  
412 differential contribution of the receptors when they are co-expressed. Here, we have addressed this  
413 question and measured the early onset of cAMP production in cells that endogenously express both  
414 EP2 and EP4. Using selective EP2 and EP4 antagonists, we demonstrate that EP2 induces sustained  
415 cAMP, whereas EP4-mediated cAMP production is faster but more transient. This difference may be  
416 partially explained by the fact that EP4, and not EP2, is internalized shortly after stimulation with  
417 PGE2, which halts further signalling [23; 45]. Furthermore, our results showing a sustained EP2-  
418 induced cAMP production are in line with the previous observation that EP2 is the main cAMP  
419 generator after extended PGE2 stimulation [42]. We also know that EP4 can couple to both  $G\alpha_s$  and  
420  $G\alpha_i$  [22]. Here, we provide additional evidence that  $G\alpha_i$  is only linked to EP4 and not to EP2 and that  
421  $G\alpha_i$  attenuates the cAMP response induced by low PGE2 concentrations. Given that several GPCRs do  
422 not precouple with  $G\alpha_i$  [46], it would be important to determine how and when EP4 and  $G\alpha_i$  interact.  
423 In a recent study, hidden Markov modeling classified G proteins into four diffusion states, of which  
424 the slowest two states represent G proteins that interact in hot spots for GPCR activation [47]. The  
425 same study employed single-molecule tracking to show that adrenergic receptors and  $G\alpha_i$  proteins  
426 interact only transiently within these hot spots [47]. Single-molecule imaging methods are excellent  
427 tools to understand the fundamental principles of G protein dynamics and could be exploited to better  
428 understand the molecular mechanisms regulating the spatiotemporal interaction between EP4 and  $G\alpha_s$   
429 or  $G\alpha_i$ , which could shape the cAMP production profile.

430 Our FRET measurements also reveal that the cAMP response of EP4 is dose-dependent,  
431 whereas the EP2-induced cAMP production is negligible at low PGE2 concentrations and strong at  
432 high PGE2 concentrations. EP4 has a higher affinity for PGE2 than EP2, as indicated by dissociation  
433 constants of 0.59 nM and 13 nM, respectively [48]. The high affinity of EP4 explains its responsiveness  
434 to low PGE2 concentrations, but the apparent irresponsiveness of EP2 to PGE2 concentrations below  
435 1  $\mu$ M cannot be explained by its lower affinity for PGE2, based on the magnitude of its dissociation  
436 constant. Therefore, additional mechanisms that mediate the all-or-nothing response of EP2 could exist  
437 and might include receptor (hetero/homo) oligomerization, which are documented for other GPCRs  
438 [49] but remain to be identified for EP2 and EP4. Importantly, our results indicate that EP4 is the main  
439 producer and regulator of cAMP production at low, possibly physiological, PGE2 concentrations,  
440 whereas EP2 boosts cAMP levels only when PGE2 concentration increases above a certain threshold,  
441 as it could (locally) occur in inflamed or tumour tissues.

442 Interestingly, our experiments using cAMP FRET biosensor show that EP2 and EP4 both signal  
443 more strongly when stimulated selectively. This indicates that simultaneous activation of both  
444 receptors limits efficient signaling and suggests the presence of signaling crosstalk between EP2 and  
445 EP4. Since both EP2 and EP4 couple to  $G\alpha_s$ , competition for downstream effectors could contribute to  
446 the attenuated cAMP response observed in the absence of receptor antagonists. Additionally, inhibitory  
447 interactions between activated receptors at the plasma membrane could attenuate the PGE2-induced  
448 cAMP response to establish an integrated signal that fine-tunes downstream effects. Although the  
449 mechanisms underlying this potential crosstalk remains to be deciphered, our results strongly indicate  
450 that the EP2 and EP4 signalling axes may be closely intertwined.

451 The organization of GPCR signaling has previously been linked to membrane domains and the  
452 cortical microtubule network [50]. Here, we show that an intact microtubule network is necessary for  
453 efficient signaling of both EP2 and EP4. Remarkably, several other studies show that cAMP production  
454 is dampened by intact microtubules and lipid membrane domains [50; 51; 52]. Specifically,  
455 microtubules were suggested to restrict the interactions of  $G\alpha_s$  with GPCRs and AC, limiting the  
456 efficiency of cAMP responses [51; 53]. Yet, most previous research focused on adrenergic receptors,  
457 which primarily localize to lipid-raft domains [54]. By contrast, the insensitivity of EP receptors to  
458 cholesterol depletion suggests that EP2 and EP4 mainly localize in non-raft regions [55]. Moreover, the  
459 AC isoform 2, which is the AC isoform that responds most strongly to PGE2, is also located in non-  
460 raft domains, further supporting the notion that PGE2 signaling occurs outside lipid rafts and possibly  
461 explaining their differential dependence on the microtubule network that was reported for the  
462 adrenergic receptors [55]. Although a mechanistic explanation is still lacking, the different sensitivity  
463 of EP2 and EP4 to microtubule disruption is striking: whereas PGE2-EP4 signalling is partially  
464 reduced, PGE2-EP2 signalling is completely abolished by nocodazole treatment. Imaging of  
465 microtubules in combination with single-particle tracking of EP receptors could reveal the role of  
466 microtubules in PGE2 signaling. Furthermore, a detailed molecular investigation of  $G\alpha_s$  and  $G\alpha_i$   
467 dynamics is required to accurately describe the organization and receptor-coupling of the different  $G\alpha$   
468 proteins involved. The different sensitivity of EP2 and EP4 to nocodazole together with the apparently  
469 contradictory results between adrenergic and prostaglandin receptors strongly emphasizes the  
470 complexity of GPCR spatiotemporal organization and the importance of studying the regulation of a  
471 specific receptor in its endogenous settings.

472 Based on our experimental observations, we here present a schematic model for the cAMP  
473 responses established by EP2 and EP4. Upon selective stimulation of EP4, both  $G\alpha_s$  and  $G\alpha_i$  proteins  
474 are activated (**Figure 5A**). Active  $G\alpha_s$  proteins modulate the activity of AC, resulting in a strong cAMP  
475 response.  $G\alpha_i$  functions to fine-tune the cAMP production at low PGE2 concentrations. As EP4 is  
476 subjected to desensitization and internalization [23; 25], the elicited cAMP response subsides over  
477 time. When EP2 is selectively stimulated, only  $G\alpha_s$  controls AC activity (**Figure 5B**). The resulting  
478 cAMP response does not subside because EP2 is insensitive to receptor desensitization and

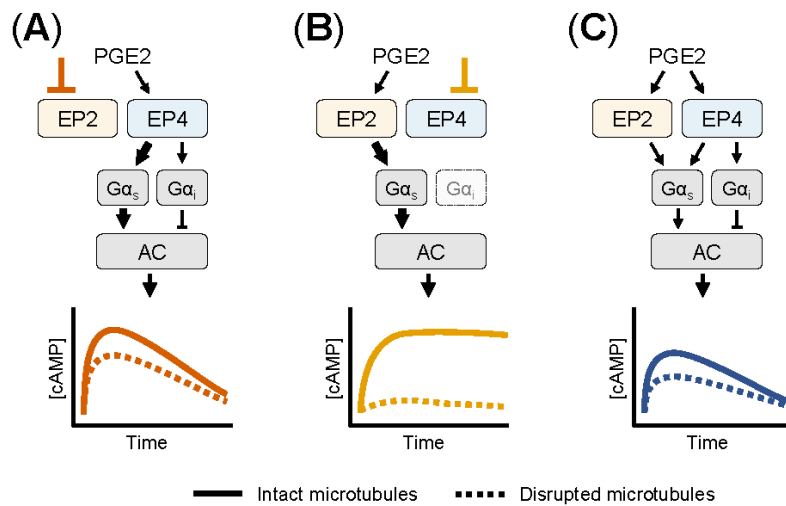

**Figure 5. Schematic overview of the cAMP responses induced by EP2 and EP4.** (A) When only EP4 is active, both  $G\alpha_s$  and  $G\alpha_i$  control AC activity.  $G\alpha_s$  induces a dose-dependent cAMP response that is dampened by  $G\alpha_i$ . The cAMP signal subsides over time and is attenuated by microtubule disruption. (B) When EP2 is activated selectively, only  $G\alpha_s$  modulates AC activity. The resulting cAMP response is either weak or strong, does not subside and completely relies on an intact microtubule network. (C) When both EP2 and EP4 are active, competition for  $G\alpha_s$  dampens the integrated cAMP

495 response. Signaling crosstalk between EP2 and EP4 allows the cell to respond differently to PGE2 depending  
 496 on the organization and expression of EP2 and EP4.

497  
 498 internalization [23]. Disruption of the microtubule network dampens the cAMP levels induced by both  
 499 EP2 and EP4, albeit with different strength, showing that microtubules play an important role in the  
 500 organization of EP receptor signaling. Upon simultaneous activation of EP2 and EP4,  $G\alpha$  proteins are  
 501 activated by both EP2 and EP4 resulting in an integrated cAMP response (Figure 5C). Competition  
 502 between EP2 and EP4 for  $G\alpha_s$  likely reduces the signaling efficiency of individual receptors and  
 503 thereby moderates final cAMP levels. Since EP4 has a higher affinity for PGE2 than EP2 [48], EP4 is  
 504 the main gatekeeper of cAMP levels, especially at low PGE2 concentrations, while EP2 becomes  
 505 important only at high PGE2 concentrations that will result in a strong and sustained cAMP production.

506 Increased PGE2 concentrations have been reported in the tumor microenvironment of several  
 507 cancer types [9; 10; 11; 12]. Since PGE2 regulates immune cell function, the selective modulation of  
 508 EP receptor signaling pathways has been proven to enhance the antitumor immune response [56; 57;  
 509 58]. Further insight into the concerted action of EP2 and EP4 will be essential to efficiently control the  
 510 cellular responses to PGE2.

### 511 512 Author Contributions

513 WV, KvdD, BJ, SdK performed the experiments and analyzed the data. DSL provided analytical tools.  
 514 WV, SdK, DSL and AC wrote the manuscript with input from all authors. DSL and AC supervised the  
 515 entire project.

### 516 517 Acknowledgements

518 The authors are indebted to The microscopy experiments were mostly conducted at the Radboudumc  
 519 Technology Center Microscopy with the exception of the FLIM measurements that were performed at  
 520 the University of Twente, Enschede, The Netherlands. The authors declare that the research was  
 521 conducted in the absence of any commercial or financial relationships that could be construed as a  
 522 potential conflict of interest.

### 523 524 Funding

525 This work was supported by a Human Frontiers Science Program grant awarded to D.S. Lidke and A.  
 526 Cambi (RGY0074/2008) and by a NIH R35GM-126934 grant awarded to D.S. Lidke.

527

## 528 **References**

- 529 [1] K.L. Pierce, R.T. Premont, and R.J. Lefkowitz, Seven-transmembrane receptors.  
530 *Nat.Rev.Mol.Cell Biol.* 3 (2002) 639-650.
- 531 [2] W.L. Smith, Prostanoid biosynthesis and mechanisms of action. *Am.J.Physiol* 263 (1992) F181-  
532 F191.
- 533 [3] R.A. Coleman, W.L. Smith, and S. Narumiya, International Union of Pharmacology  
534 classification of prostanoid receptors: properties, distribution, and structure of the receptors and their  
535 subtypes. *Pharmacol.Rev.* 46 (1994) 205-229.
- 536 [4] D.F. Legler, M. Bruckner, E. Uetz-von Allmen, and P. Krause, Prostaglandin E2 at new glance:  
537 novel insights in functional diversity offer therapeutic chances. *Int J Biochem Cell Biol* 42 (2010) 198-  
538 201.
- 539 [5] S. Narumiya, Prostanoids in immunity: roles revealed by mice deficient in their receptors. *Life*  
540 *sciences* 74 (2003) 391-5.
- 541 [6] D.F. Legler, P. Krause, E. Scandella, E. Singer, and M. Groettrup, Prostaglandin E2 is generally  
542 required for human dendritic cell migration and exerts its effect via EP2 and EP4 receptors. *J Immunol*  
543 176 (2006) 966-73.
- 544 [7] N. Gualde, and H. Harizi, Prostanoids and their receptors that modulate dendritic cell-mediated  
545 immunity. *Immunology and cell biology* 82 (2004) 353-60.
- 546 [8] S.F. van Helden, M.M. Oud, B. Joosten, N. Peterse, C.G. Figdor, and F.N. van Leeuwen, PGE2-  
547 mediated podosome loss in dendritic cells is dependent on actomyosin contraction downstream of the  
548 RhoA-Rho-kinase axis. *J Cell Sci* 121 (2008) 1096-106.
- 549 [9] A. Rasmuson, A. Kock, O.M. Fuskevåg, B. Kruspig, J. Simón-Santamaría, V. Gogvadze, J.I.  
550 Johnsen, P. Kogner, and B. Sveinbjörnsson, Autocrine Prostaglandin E2 Signaling Promotes Tumor  
551 Cell Survival and Proliferation in Childhood Neuroblastoma. *PLOS ONE* 7 (2012) e29331.
- 552 [10] B. Rigas, I.S. Goldman, and L. Levine, Altered eicosanoid levels in human colon cancer. *J*  
553 *Lab Clin Med* 122 (1993) 518-23.
- 554 [11] L.R. Howe, Inflammation and breast cancer. Cyclooxygenase/prostaglandin signaling and  
555 breast cancer. *Breast Cancer Research* 9 (2007) 210.
- 556 [12] M. Huang, M. Stolina, S. Sharma, J.T. Mao, L. Zhu, P.W. Miller, J. Wollman, H. Herschman,  
557 and S.M. Dubinett, Non-Small Cell Lung Cancer Cyclooxygenase-2-dependent Regulation of  
558 Cytokine Balance in Lymphocytes and Macrophages: Up-Regulation of Interleukin 10 and Down-  
559 Regulation of Interleukin 12 Production. *Cancer Research* 58 (1998) 1208-1216.
- 560 [13] K. Kobayashi, K. Omori, and T. Murata, Role of prostaglandins in tumor microenvironment.  
561 *Cancer Metastasis Rev* 37 (2018) 347-354.
- 562 [14] Y. Ma, G.V. Shurin, Z. Peiyuan, and M.R. Shurin, Dendritic cells in the cancer  
563 microenvironment. *J Cancer* 4 (2013) 36-44.
- 564 [15] J.S. Klarquist, and E.M. Janssen, Melanoma-infiltrating dendritic cells: Limitations and  
565 opportunities of mouse models. *Oncoimmunology* 1 (2012) 1584-1593.
- 566 [16] S. Kubo, H.K. Takahashi, M. Takei, H. Iwagaki, T. Yoshino, N. Tanaka, S. Mori, and M.  
567 Nishibori, E-prostanoid (EP)2/EP4 receptor-dependent maturation of human monocyte-derived  
568 dendritic cells and induction of helper T2 polarization. *The Journal of pharmacology and experimental*  
569 *therapeutics* 309 (2004) 1213-20.

- 570 [17] H. Harizi, C. Grosset, and N. Gualde, Prostaglandin E2 modulates dendritic cell function via  
571 EP2 and EP4 receptor subtypes. *Journal of leukocyte biology* 73 (2003) 756-63.
- 572 [18] S.F. van Helden, D.J. Krooshoop, K.C. Broers, R.A. Raymakers, C.G. Figdor, and F.N. van  
573 Leeuwen, A critical role for prostaglandin E2 in podosome dissolution and induction of high-speed  
574 migration during dendritic cell maturation. *J Immunol* 177 (2006) 1567-74.
- 575 [19] A. Honda, Y. Sugimoto, T. Namba, A. Watabe, A. Irie, M. Negishi, S. Narumiya, and A.  
576 Ichikawa, Cloning and expression of a cDNA for mouse prostaglandin E receptor EP2 subtype.  
577 *J.Biol.Chem.* 268 (1993) 7759-7762.
- 578 [20] J.W. Regan, T.J. Bailey, D.J. Pepperl, K.L. Pierce, A.M. Bogardus, J.E. Donello, C.E.  
579 Fairbairn, K.M. Kedzie, D.F. Woodward, and D.W. Gil, Cloning of a novel human prostaglandin  
580 receptor with characteristics of the pharmacologically defined EP2 subtype. *Mol.Pharmacol.* 46 (1994)  
581 213-220.
- 582 [21] M. Leduc, B. Breton, C. Gales, C. Le Gouill, M. Bouvier, S. Chemtob, and N. Heveker,  
583 Functional selectivity of natural and synthetic prostaglandin EP4 receptor ligands. *The Journal of*  
584 *pharmacology and experimental therapeutics* 331 (2009) 297-307.
- 585 [22] H. Fujino, and J.W. Regan, EP4 Prostanoid Receptor Coupling to a Pertussis Toxin-Sensitive  
586 Inhibitory G Protein. *Molecular pharmacology* 69 (2006) 5-10.
- 587 [23] S. Desai, H. April, C. Nwaneshiudu, and B. Ashby, Comparison of agonist-induced  
588 internalization of the human EP2 and EP4 prostaglandin receptors: role of the carboxyl terminus in  
589 EP4 receptor sequestration. *Mol.Pharmacol.* 58 (2000) 1279-1286.
- 590 [24] R.B. Penn, R.M. Pascual, Y.M. Kim, S.J. Mundell, V.P. Krymskaya, R.A. Panettieri, Jr., and  
591 J.L. Benovic, Arrestin specificity for G protein-coupled receptors in human airway smooth muscle.  
592 *The Journal of biological chemistry* 276 (2001) 32648-56.
- 593 [25] S. Desai, and B. Ashby, Agonist-induced internalization and mitogen-activated protein kinase  
594 activation of the human prostaglandin EP4 receptor. *FEBS letters* 501 (2001) 156-60.
- 595 [26] Y. Mao, D. Sarhan, A. Steven, B. Seliger, R. Kiessling, and A. Lundqvist, Inhibition of tumor-  
596 derived prostaglandin-e2 blocks the induction of myeloid-derived suppressor cells and recovers natural  
597 killer cell activity. *Clin Cancer Res* 20 (2014) 4096-106.
- 598 [27] B. Thurner, C. Roder, D. Dieckmann, M. Heuer, M. Kruse, A. Glaser, P. Keikavoussi, E.  
599 Kampgen, A. Bender, and G. Schuler, Generation of large numbers of fully mature and stable dendritic  
600 cells from leukapheresis products for clinical application. *J Immunol Methods* 223 (1999) 1-15.
- 601 [28] I.J. de Vries, A.A. Eggert, N.M. Scharenborg, J.L. Vissers, W.J. Lesterhuis, O.C. Boerman,  
602 C.J. Punt, G.J. Adema, and C.G. Figdor, Phenotypical and functional characterization of clinical grade  
603 dendritic cells. *J Immunother* 25 (2002) 429-38.
- 604 [29] J.B. Klarenbeek, J. Goedhart, M.A. Hink, T.W. Gadella, and K. Jalink, A mTurquoise-based  
605 cAMP sensor for both FLIM and ratiometric read-out has improved dynamic range. *PLoS.One.* 6  
606 (2011) e19170.
- 607 [30] S.K. Gibson, and A.G. Gilman, Galpha and Gbeta subunits both define selectivity of G protein  
608 activation by alpha2-adrenergic receptors. *Proc Natl Acad Sci U S A* 103 (2006) 212-7.
- 609 [31] S. De Keijzer, M.B. Meddens, R. Torensma, and A. Cambi, The multiple faces of  
610 prostaglandin E2 G-protein coupled receptor signaling during the dendritic cell life cycle. *Int J Mol Sci*  
611 14 (2013) 6542-55.



- 612 [32] N.E. Hubbard, S. Lee, D. Lim, and K.L. Erickson, Differential mRNA expression of  
613 prostaglandin receptor subtypes in macrophage activation. *Prostaglandins, leukotrienes, and essential*  
614 *fatty acids* 65 (2001) 287-94.
- 615 [33] M. Bünemann, M. Frank, and M.J. Lohse, Gi protein activation in intact cells involves subunit  
616 rearrangement rather than dissociation. *Proceedings of the National Academy of Sciences* 100 (2003)  
617 16077-16082.
- 618 [34] N. Wang, K. Yan, and M.M. Rasenick, Tubulin binds specifically to the signal-transducing  
619 proteins, Gs alpha and Gi alpha 1. *J.Biol.Chem.* 265 (1990) 1239-1242.
- 620 [35] M.n. Côté, M.D. Payet, and N. Gallo-Payet, Association of  $\alpha$ s-Subunit of the Gs Protein with  
621 Microfilaments and Microtubules: Implication during Adrenocorticotropin Stimulation in Rat Adrenal  
622 Glomerulosa Cells1. *Endocrinology* 138 (1997) 69-78.
- 623 [36] T. Sarma, T. Voyno-Yasenetskaya, T.J. Hope, and M.M. Rasenick, Heterotrimeric G-proteins  
624 associate with microtubules during differentiation in PC12 pheochromocytoma cells. *Faseb J* 17 (2003)  
625 848-59.
- 626 [37] E. Scandella, Y. Men, S. Gillessen, R. Forster, and M. Groettrup, Prostaglandin E2 is a key  
627 factor for CCR7 surface expression and migration of monocyte-derived dendritic cells. *Blood* 100  
628 (2002) 1354-61.
- 629 [38] K. Kabashima, D. Sakata, M. Nagamachi, Y. Miyachi, K. Inaba, and S. Narumiya,  
630 Prostaglandin E2-EP4 signaling initiates skin immune responses by promoting migration and  
631 maturation of Langerhans cells. *Nature medicine* 9 (2003) 744-9.
- 632 [39] G. Flórez-Grau, R. Cabezón, K.J.E. Borgman, C. España, J.J. Lozano, M.F. Garcia-Parajo,  
633 and D. Benítez-Ribas, Up-regulation of EP2 and EP3 receptors in human tolerogenic dendritic cells  
634 boosts the immunosuppressive activity of PGE2. *Journal of leukocyte biology* 102 (2017) 881-895.
- 635 [40] N.J. Poloso, P. Urquhart, A. Nicolaou, J. Wang, and D.F. Woodward, PGE(2) differentially  
636 regulates monocyte-derived dendritic cell cytokine responses depending on receptor usage  
637 (EP(2)/EP(4)). *Molecular immunology* 54 (2013) 284-295.
- 638 [41] C. Yao, D. Sakata, Y. Esaki, Y. Li, T. Matsuoka, K. Kuroiwa, Y. Sugimoto, and S. Narumiya,  
639 Prostaglandin E2-EP4 signaling promotes immune inflammation through TH1 cell differentiation and  
640 TH17 cell expansion. *Nature medicine* 15 (2009) 633-640.
- 641 [42] H. Fujino, K.A. West, and J.W. Regan, Phosphorylation of glycogen synthase kinase-3 and  
642 stimulation of T-cell factor signaling following activation of EP2 and EP4 prostanoid receptors by  
643 prostaglandin E-2. *Journal of Biological Chemistry* 277 (2002) 2614-2619.
- 644 [43] H. Fujino, W. Xu, and J.W. Regan, Prostaglandin E2 induced functional expression of early  
645 growth response factor-1 by EP4, but not EP2, prostanoid receptors via the phosphatidylinositol 3-  
646 kinase and extracellular signal-regulated kinases. *J.Biol.Chem.* 278 (2003) 12151-12156.
- 647 [44] H. Fujino, S. Salvi, and J.W. Regan, Differential regulation of phosphorylation of the cAMP  
648 response element-binding protein after activation of EP2 and EP4 prostanoid receptors by  
649 prostaglandin E2. *Molecular pharmacology* 68 (2005) 251-9.
- 650 [45] F.F. Hamdan, M.D. Rochdi, B. Breton, D. Fessart, D.E. Michaud, P.G. Charest, S.A. Laporte,  
651 and M. Bouvier, Unraveling G Protein-coupled Receptor Endocytosis Pathways Using Real-time  
652 Monitoring of Agonist-promoted Interaction between  $\beta$ -Arrestins and AP-2. *Journal of Biological*  
653 *Chemistry* 282 (2007) 29089-29100.

- 654 [46] A. Bondar, and J. Lazar, G protein Gi1 exhibits basal coupling but not preassembly with G  
655 protein-coupled receptors. *Journal of Biological Chemistry* (2017).
- 656 [47] T. Sungkaworn, M.-L. Jobin, K. Burnecki, A. Weron, M.J. Lohse, and D. Calebiro, Single-  
657 molecule imaging reveals receptor–G protein interactions at cell surface hot spots. *Nature* 550 (2017)  
658 543-547.
- 659 [48] M. Abramovitz, M. Adam, Y. Boie, M. Carriere, D. Denis, C. Godbout, S. Lamontagne, C.  
660 Rochette, N. Sawyer, N.M. Tremblay, M. Belley, M. Gallant, C. Dufresne, Y. Gareau, R. Ruel, H.  
661 Juteau, M. Labelle, N. Ouimet, and K.M. Metters, The utilization of recombinant prostanoid receptors  
662 to determine the affinities and selectivities of prostaglandins and related analogs. *Biochimica et*  
663 *biophysica acta* 1483 (2000) 285-93.
- 664 [49] R. Sleno, and T.E. Hebert, The Dynamics of GPCR Oligomerization and Their Functional  
665 Consequences. *Int Rev Cell Mol Biol* 338 (2018) 141-171.
- 666 [50] B.P. Head, H.H. Patel, D.M. Roth, F. Murray, J.S. Swaney, I.R. Niesman, M.G. Farquhar, and  
667 P.A. Insel, Microtubules and actin microfilaments regulate lipid raft/caveolae localization of adenylyl  
668 cyclase signaling components. *The Journal of biological chemistry* 281 (2006) 26391-9.
- 669 [51] S.M. Pontier, Y. Percherancier, S. Galandrin, A. Breit, C. Galés, and M. Bouvier, Cholesterol-  
670 dependent Separation of the  $\beta$ 2-Adrenergic Receptor from Its Partners Determines Signaling Efficacy:  
671 INSIGHT INTO NANOSCALE ORGANIZATION OF SIGNAL TRANSDUCTION. *Journal of*  
672 *Biological Chemistry* 283 (2008) 24659-24672.
- 673 [52] J.A. Allen, J.Z. Yu, R.H. Dave, A. Bhatnagar, B.L. Roth, and M.M. Rasenick, Caveolin-1 and  
674 Lipid Microdomains Regulate G<sub>s</sub> Trafficking and Attenuate G<sub>s</sub>/Adenylyl  
675 Cyclase Signaling. *Molecular pharmacology* 76 (2009) 1082-1093.
- 676 [53] A.H. Czysz, J.M. Schappi, and M.M. Rasenick, Lateral Diffusion of G $\alpha$ s in the Plasma  
677 Membrane Is Decreased after Chronic but not Acute Antidepressant Treatment: Role of Lipid Raft and  
678 Non-Raft Membrane Microdomains. *Neuropsychopharmacology* 40 (2015) 766-773.
- 679 [54] S.R. Agarwal, P.-C. Yang, M. Rice, C.A. Singer, V.O. Nikolaev, M.J. Lohse, C.E. Clancy,  
680 and R.D. Harvey, Role of Membrane Microdomains in Compartmentation of cAMP Signaling. *PLOS*  
681 *ONE* 9 (2014) e95835.
- 682 [55] A.S. Bogard, P. Adris, and R.S. Ostrom, Adenylyl Cyclase 2 Selectively Couples to E  
683 Prostanoid Type 2 Receptors, Whereas Adenylyl Cyclase 3 Is Not Receptor-Regulated in Airway  
684 Smooth Muscle. *Journal of Pharmacology and Experimental Therapeutics* 342 (2012) 586-595.
- 685 [56] X. Ma, D. Holt, N. Kundu, J. Reader, O. Goloubeva, Y. Take, and A.M. Fulton, A  
686 prostaglandin E (PGE) receptor EP4 antagonist protects natural killer cells from PGE-mediated  
687 immunosuppression and inhibits breast cancer metastasis. *Oncoimmunology* 2 (2013) e22647.
- 688 [57] M. Majumder, X. Xin, L. Liu, G.V. Girish, and P.K. Lala, Prostaglandin E2 receptor EP4 as  
689 the common target on cancer cells and macrophages to abolish angiogenesis, lymphangiogenesis,  
690 metastasis, and stem-like cell functions. *Cancer Sci* 105 (2014) 1142-51.
- 691 [58] D.I. Albu, Z. Wang, K.C. Huang, J. Wu, N. Twine, S. Leacu, C. Ingersoll, L. Parent, W. Lee,  
692 D. Liu, R. Wright-Michaud, N. Kumar, G. Kuznetsov, Q. Chen, W. Zheng, K. Nomoto, M. Woodall-  
693 Jappe, and X. Bao, EP4 Antagonism by E7046 diminishes Myeloid immunosuppression and synergizes  
694 with Treg-reducing IL-2-Diphtheria toxin fusion protein in restoring anti-tumor immunity.  
695 *Oncoimmunology* 6 (2017) e1338239.
- 696
